1 **Aberrant flexibility of dynamic brain network in patients**  
2 **with autism spectrum disorder**

3 Hui Zhang<sup>1</sup>, Dehong Peng<sup>2,\*</sup>, Shixiong Tang<sup>2</sup>, Anyao Bi<sup>2</sup>, and Yicheng Long<sup>3</sup>

4

5 <sup>1</sup>The Department of Clinical Nursing Teaching and Research Section, The Second  
6 Xiangya Hospital, Central South University, Changsha, Hunan, China;

7 <sup>2</sup>Department of Radiology, The Second Xiangya Hospital, Central South University,  
8 Changsha, Hunan, China;

9 <sup>3</sup>Department of Psychiatry, and National Clinical Research Center for Mental  
10 Disorders, The Second Xiangya Hospital, Central South University, Changsha,  
11 Hunan, China

12

13 **\*Correspondence:**

14 Dehong Peng

15 pdh123456@csu.edu.cn

16

17

18

19 **Abstract**

20 **Introduction:** Autism spectrum disorder (ASD) is a collection of neurodevelopmental  
21 disorders whose pathobiology remains elusive. This study aimed to investigate the  
22 possible neural mechanisms underlying ASD using a dynamic brain network model and  
23 a relatively large-sample, multi-site dataset.

24 **Methods:** Resting-state functional magnetic resonance imaging data were acquired  
25 from 208 ASD patients and 227 typical development (TD) controls, who were drawn  
26 from the multi-site Autism Brain Imaging Data Exchange (ABIDE)-Preprocessed  
27 database. Brain network flexibilities were estimated and compared between the ASD  
28 and TD groups at both global and local levels, after adjusting for sex, age, head motion,  
29 and site effects. Correlations between the Autism Diagnostic Observation Schedule  
30 (ADOS) total score and brain network measures were also investigated after adjusting  
31 for the same above covariates.

32 **Results:** Significantly increased brain network flexibilities (indicating a decreased  
33 stability) at the global level, as well as at the local level within the default-mode and  
34 sensorimotor areas were found in ASD patients than TD participants. Additionally,  
35 significant ASD-related decreases in flexibilities (indicating excessively increased  
36 stability) were also observed in several occipital regions at the nodal level. Most of  
37 these changes were significantly correlated with the ADOS total score in the entire  
38 sample.

39 **Conclusion:** The results in this study suggested that ASD is characterized by significant  
40 changes in temporal stabilities of functional brain network. Our results also pointed to  
41 ASD-related dysfunctions in the default-mode, sensorimotor, and occipital systems  
42 from a perspective of brain network stability, which can further strengthen our  
43 understanding of the pathobiology of ASD.

44

45 **Keywords:** connectome; neuroimaging; fMRI; dynamic functional connectivity;  
46 dynamic brain network; autism spectrum disorder

47

48

## 49 **1. Introduction**

50 Autism spectrum disorder (ASD) is a collection of neurodevelopmental disorders  
51 which are characterized by early social communication deficits and impaired repetitive  
52 behaviors/interests (1,2). The prevalence of ASD is growing in the past decades, leading  
53 to high economic burdens globally (1,3). However, the pathobiology of ASD remains  
54 elusive; multiple genetic mutations, maternal immune activations, and environmental  
55 factors were thought to be involved in the development of ASD (2,4).

56 Functional magnetic resonance imaging (fMRI) has been widely used in clinical  
57 studies, as a non-invasive and convenient method, to investigate the neural mechanisms  
58 underlying many common mental disorders (e.g., major depressive disorder and  
59 schizophrenia) (5–7). Past fMRI studies have demonstrated that ASD is associated with  
60 aberrant brain functions such as significantly decreased/increased functional  
61 connectivity (FC) within the visual, frontoparietal (cognition), and language-related  
62 subnetworks in the brain (8–11). These studies have significantly improved our  
63 understanding of the complex pathobiology of ASD.

64 The traditional fMRI studies were usually performed under the assumption that  
65 FCs within or between different brain networks would be “static (never change)” over  
66 time during the fMRI scans. In recent years, however, it was promoted that FCs  
67 within/between different brain networks would actually fluctuate over time, and that  
68 constructing a “dynamic” rather than “static” brain network model may be valuable to  
69 capture important information ignored by traditional brain network models (12–14).  
70 Research on properties of “dynamic brain network” under such a framework are  
71 emerging, with various measures of temporal variability/stability of the brain networks  
72 proposed by different researchers (15–18). Specifically, the “flexibility” (also named  
73 “switching rate” by some researchers) of a dynamic functional brain network, which  
74 estimates the temporal stability of brain network according to its changing frequencies  
75 of modularity structures, has been proved to valid (19) and widely used in recent studies  
76 (20–28). In these studies, the flexibility of brain network has been associated with  
77 cognition (20,21), emotion (26), aging (24), as well as many common neuropsychiatric  
78 disorders such as Parkinson's disease (27), attention-deficit/hyperactivity disorder (25),

79 schizophrenia (22), anxiety disorder (28), and major depressive disorder (23). Notably,  
80 a published study by Harlalka et al. (29) has reported that atypical flexibility of the  
81 dynamic functional brain network can quantify (positively associated with) the illness  
82 severity in ASD patients. A significantly increased brain network flexibility when  
83 compared to matched normal controls has been thought to be reflective of brain  
84 dysfunction, which indicates a decreased stability of the brain network organization  
85 (30,31). Therefore, the observed positive correlation of symptom severity with  
86 flexibility in ASD patients (29) has suggested that a disrupted stability of the brain  
87 network may be related to the pathobiology of ASD.

88 Nevertheless, there are still some notable limitations in the above-mentioned  
89 earlier work by Harlalka et al. (29). First, their sample size is relatively small: only 72  
90 patients with ASD and 72 typical development (TD) controls from a single study site  
91 was included (29). The previous researchers have suggested that for human connectome  
92 studies, satisfactory statistical power and reliability can be achieved when the sample  
93 size is larger than a cutoff of approximately 250 subjects (32). Therefore, repeating the  
94 study with a larger sample size might be necessary to obtain more reliable conclusion.  
95 Second, besides brain network flexibility at the global level, the flexibility can be also  
96 estimated at the subnetwork level for particular subsystems of the brain (e.g., for the  
97 default-mode, visual, and frontoparietal subnetworks). For instance, using the measure  
98 of brain network flexibility, a study by Huang et al. (30) suggested that childhood  
99 trauma experiences are linked to decreased temporal stabilities within the default-mode,  
100 fronto-parietal, cingulo-opercular, and occipital subnetworks in the brain network.  
101 Beyond the global-level brain network flexibility, such results could further strengthen  
102 our understanding of the relationship between brain network stability and psychiatric  
103 symptoms/disorders at the local level. However, in the earlier study by Harlalka et al.  
104 (29), there were no results reported on the possible relationship between brain network  
105 flexibility and the ASD at the subnetwork level, which deserves further investigation.  
106 Third, when constructing the dynamic functional brain network, an anatomical-based  
107 Automated Anatomical Labeling (AAL) atlas with 90 regions of interest (ROIs) was  
108 used in the study by Harlalka et al. (29). However, it has been well documented that in

109 studies on human functional brain networks, the anatomical-based AAL atlas would  
110 have a poorer performance compared to those higher-resolution functional atlases, such  
111 as the Dosenbach atlas (with 160 ROIs) and the Power atlas (with 264 ROIs) (32–34).  
112 Thus, performing the analyses based on a functional atlas might be also meaningful for  
113 obtaining more accurate results.

114 To fill the gaps as mentioned above, this study aimed to investigate the possible  
115 associations between changes in the brain network flexibility and ASD using a multi-  
116 site resting-state fMRI dataset with a relatively large sample size (~500 participants in  
117 total). Specifically, a widely used, validated functional atlas (Dosenbach atlas) was used,  
118 and the brain network flexibility was compared between patients with ASD and TD  
119 controls at both the global and local (subnetwork) levels. By using a much larger sample  
120 and potentially better methodology, we anticipate that the results will provide more  
121 reliable and accurate conclusions on the basis of prior work, as well as contribute to a  
122 deeper understanding of the pathobiology of ASD.

123

## 124 **2. Methods and Materials**

### 125 **2.1. Participants**

126 The analyzed sample in this study consisted of 435 subjects (208 ASD patients and  
127 227 healthy TD participants) from 9 study sites. Such a sample was drawn from the  
128 open-access, multi-site Autism Brain Imaging Data Exchange (ABIDE)-Preprocessed  
129 database (<http://preprocessed-connectomes-project.org/abide/>) (35,36). Details about  
130 the participant recruitment, assessment, resting-state fMRI neuroimaging data  
131 acquisition, and data preprocessing protocols can be found on the ABIDE website and  
132 prior publications (35,36). Most participants completed the Autism Diagnostic  
133 Observation Schedule (ADOS) (37) to assess the severity of ASD symptoms.

134 The original ABIDE-Preprocessed database includes more than one thousand  
135 participants recruited from 16 different study sites. In this study, we selected the  
136 participants in the analyzed sample based on the following steps: 1) the participants  
137 whose demographic information was incomplete (e.g., sex and age) were firstly  
138 excluded; 2) participants were excluded when the repetition time (TR)  $\neq$  2 seconds

139 during the fMRI scans, to prevent biases caused by different temporal resolutions of the  
140 dynamic brain networks (38,39); 3) participant with poor fMRI data quality were  
141 excluded, as defined by a mean framewise displacement (FD)  $> 0.2$  mm (39,40), bad  
142 image coverage (signal loss in any ROI in the Dosenbach atlas), or any of the 3  
143 independent raters gave a “Fail” or “Maybe” rating when performing the manual data  
144 checking during the ABIDE preprocessing pipeline (29); 4) finally, the sites with only  
145 less than 10 individuals left after the above steps were excluded from the analysis, as  
146 did in some other multi-site fMRI studies (40,41). The final analyzed sample of 435  
147 subjects were from the following nine study sites: one from the New York University  
148 (NYU), one from the Olin Center (OLIN), one from the San Diego State University  
149 (SDSU), one from the Trinity Centre for Health Sciences (TRINITY), one from the  
150 University of California Los Angeles (UCLA), two from the University of Miami  
151 (UM\_1 and UM\_2), one from the University of Utah School of Medicine (USM), as  
152 well as one from the Yale Child Study Center (YALE) (see **Table 1** for detailed number  
153 of participants in each site).

154 The ABIDE-Preprocessed data is open shared, and Institutional Review Board  
155 (IRB) approval was provided by each site (data contributor) in the ABIDE database.

156

## 157 **2.2. Neuroimaging data acquisition and preprocessing**

158 The resting-state fMRI data downloaded from the ABIDE database has been  
159 preprocessed using the pipelines whose details can be found at: [http://preprocessed-](http://preprocessed-connectomes-project.org/abide/Pipelines.html)  
160 [connectomes-project.org/abide/Pipelines.html](http://preprocessed-connectomes-project.org/abide/Pipelines.html). For all participants, the fMRI scans  
161 were acquired and preprocessed in each study site independently. The scans were  
162 acquired using SIEMENS, PHILIPS, or GE magnetic resonance imaging machines; the  
163 TR was 2 seconds for all scans but there might be differences in other scanning  
164 parameters (e.g., echo time and total scan duration). The preprocessing pipeline  
165 includes slice timing correction, motion realignment, nuisance signals (motion and  
166 tissue signals) removal, and registration. Notably, the ABIDE database provided both  
167 the preprocessed data with and without the step of global signal regression (GSR). In  
168 the current study, we used the data without GSR since the usage of GSR is still  
169 controversial (42,43). Furthermore, to control for confounding effects caused by

170 differences in data acquisition and preprocessing procedures between different site, we  
171 included “site” as covariates (using dummy coding) in all analyses (see details in the  
172 followed sections).

173

### 174 **2.3. Construction of dynamic brain networks**

175 The steps of constructing dynamic brain networks and estimating brain network  
176 flexibility are summarized in **Figure 1**. A dynamic functional brain network is  
177 comprised of a set of nodes (ROIs) and connections (FCs) between nodes, where the  
178 strengths of connections change over time (44). In this study, nodes in the dynamic  
179 brain network were defined using the 160 ROIs from the Dosenbach atlas (45), which  
180 has been validated and widely used in clinical studies (30,46–48). For each participant,  
181 the mean time series were extracted from each ROI, and then divided into a number of  
182 partly overlapping time windows using the “sliding-window” method which is  
183 commonly used in dynamic brain network studies (**Figure 1A**) (49–51). Here, a fixed  
184 window width of 100 seconds (50 TRs) and a sliding step length of 2 seconds (1 TR)  
185 were used, according to the recommendations in previous works to balance the  
186 reliability of results and computational complexity (30,33,39,52). Within each time  
187 window, the FC strengths between all possible pairs of ROIs were computed using  
188 Pearson correlations, resulting in a “snapshot” of the brain network organization as  
189 shown by a 160×160 FC matrix. These time-ordered “snapshots” (matrices) then  
190 formed a multilayer dynamic brain network  $G = (G_t)_{t = 1, 2, 3, \dots, T}$ , where the  $t$ th  
191 “snapshot”/matrix ( $G_t$ ) represents the brain network organization at the  $t$ th time window  
192 (**Figure 1B**). Note that the total number of time windows ( $T$ ) was determined by the  
193 length of fMRI scanning and was thus different between different study sites.

194

### 195 **2.4. Estimating brain network flexibility**

196 After constructing the dynamic brain network for each participant, the brain  
197 network flexibility was then computed strictly following some previous publications  
198 (20,30,47,53–55). Briefly, a dynamic community detection algorithm as described by  
199 Mucha et al. (54) was implemented in Matlab using an open-source code package at:  
200 <https://github.com/GenLouvain/GenLouvain> (56). Based on such an algorithm, all  
201 nodes (ROIs) in the dynamic brain network were assigned into several communities at

202 each time window, and result in different community assignments for different time  
203 windows. The “flexibility/switching rate” of a node  $i$  ( $f_i$ ) can be then computed based  
204 on its switching frequency between different communities over time as:

$$205 \quad f_i = N_i / (T - 1),$$

206 where  $N_i$  is the number of times for which the node  $i$  “switched” from one community  
207 to another (**Figure 1C**) (57). The calculation was performed with the assistance of the  
208 Network Community Toolbox (<http://commdetect.weebly.com/>) (57). Notably, since  
209 individual runs of the algorithm could lead to slightly different community assignments,  
210 the algorithm and flexibility calculation were repeated for a total of 100 times, and the  
211 final flexibility values were averaged across the 100 runs (30,47,55,58). After that,  
212 flexibility of the whole brain network (global-level flexibility) was obtained by  
213 averaging flexibilities of all the 160 ROIs.

214 According to previous research (45), all ROIs from the Dosenbach atlas can be  
215 assigned into six subnetworks including the default-mode, occipital, cingulo-opercular,  
216 fronto-parietal, sensorimotor, and cerebellar subnetworks. On the basis of such an  
217 assignment, flexibilities for each of the six subnetworks were further obtained by  
218 averaging all nodes belonging to each particular subnetwork (22,30,47).

219

## 220 **2.5. Statistics**

221 Demographic and clinical characteristics were compared between the ASD and  
222 TD groups using two-sample  $t$  tests or Chi-square tests as appropriate. All brain  
223 network measures (flexibilities at the global, subnetwork, and nodal levels) were  
224 compared between the ASD and TD groups by the analysis of covariance (ANCOVA)  
225 covarying for age, sex, head motion (mean FD), and site (dummy coded). False  
226 discovery rate (FDR) corrections were performed to correct for multiple comparisons  
227 across the six subnetworks or across the 160 nodes. Significance was set at a FDR-  
228 corrected  $p < 0.05$ .

229 When significant between-group differences were found on any brain network  
230 measures, post-hoc correlation tests were further performed to investigate their possible  
231 relationships with the severity of clinical symptoms (measure by the total ADOS score)  
232 in the ASD patients. Here, partial Pearson correlations adjusted for age, sex, head  
233 motion and site effects were performed between the brain network measures and ADOS



234 total score. The correlation analyses were performed in the entire sample and in the  
235 ASD group independently, respectively. Similar to the between-group comparisons,  
236 FDR corrections were performed to correct for multiple correlation tests across multiple  
237 subnetworks or nodes. Significance was set at a FDR-corrected  $p < 0.05$ , too.

238

### 239 **3. Results**

#### 240 **3.1. Sample characteristics**

241 Demographic and clinical characteristics of the ASD and TD groups are presented  
242 in **Table 2**. There was no significant group difference in age ( $t = 0.847$ ,  $p = 0.398$ );  
243 nevertheless, the ASD group had a significantly higher proportion of males and a higher  
244 mean FD value than the TD group (both  $p < 0.05$ ). Furthermore, the ASD group had a  
245 significantly higher mean ADOS total score than the TD group ( $t = 20.385$ ,  $p < 0.001$ ),  
246 which is not surprising.

247

#### 248 **3.2. Group comparisons on flexibilities**

249 Compared to the TD group, the ASD patients showed a significantly higher brain  
250 network flexibility at the global level ( $F = 4.280$ ,  $p = 0.039$ ) (**Figure 2A**). Furthermore,  
251 at the subnetwork level, the ASD patients showed significantly higher flexibilities in  
252 the default-mode and sensorimotor subnetworks than TD participants ( $F =$   
253  $11.404/7.730$ , FDR-corrected  $p = 0.006/0.018$  for the default-mode/sensorimotor  
254 subnetworks, respectively) (**Figure 2B**). Compared to the TD group, significant higher  
255 nodal level flexibilities in ASD patients were found in several ROIs belonging to the  
256 default-mode subnetwork, including the precuneus, angular gyrus, and post cingulate  
257 cortex (all corrected- $p < 0.05$ , as marked in red in **Figure 3**); meanwhile, significant  
258 lower nodal level flexibilities in ASD patients were found in two ROIs within the  
259 occipital subnetwork, which are located in the occipital and post-occipital regions,  
260 respectively (both corrected- $p < 0.05$ , as marked in yellow in **Figure 3**). More details  
261 about the nodes showing significant between-group differences can be found in  
262 **Supplementary Table S1**.

263

#### 264 **3.3. Correlation analyses**

265 When testing correlations in the entire sample, the AODS total score was found to

266 be significantly positively associated with flexibilities in the default-mode and  
267 sensorimotor subnetworks flexibility, after adjusting for sex, age, head motion, and site  
268 effects ( $r = 0.109/0.134$ , FDR-corrected  $p = 0.024/0.010$  for the default-  
269 mode/sensorimotor subnetworks, respectively) (**Figure 4**). Moreover, the AODS total  
270 score was found to be significantly associated with flexibilities in several nodes  
271 belonging to the default-mode and occipital subnetworks (**Supplementary Table S2**).  
272 Nevertheless, no significant results were found when correlations were tested in the  
273 ASD group independently (corrected  $p > 0.05$ ).

274

#### 275 **4. Discussion**

276 In the present study, we explored the possible neural mechanisms underlying ASD  
277 using a measure of “flexibility” based on the dynamic brain network model, and a  
278 relatively large-sample, multi-site dataset. When compared to TD participants, the most  
279 significant findings in ASD patients included a higher brain network flexibility at the  
280 global level, as well as higher flexibilities within the default-mode/sensorimotor areas  
281 and lower flexibilities within the occipital areas at the local levels. These findings may  
282 strengthen our understanding of the pathobiology of ASD from the perspective of brain  
283 network stability.

284 At the global level, we observed a significantly higher flexibility (switching rate)  
285 in the ASD patients than TD controls (**Figure 2A**), which is in line with an earlier study  
286 with relatively small sample size by Harlalka et al. (29). It was thought that the human  
287 brain network needs to be “flexible” (changing the community structures over time) for  
288 cognitive and affective processes; however, an observed excessively increased  
289 flexibility than normal controls may also be abnormal, indicating a decreased temporal  
290 stability of the brain functional organizations (26,31,53,57). Therefore, our results  
291 could further support the opinion by Harlalka et al. that ASD is accompanied by  
292 decreased stability in the brain network (29). Some previous studies have reported both  
293 decreased and increased temporal stabilities of functional brain network in ASD  
294 patients based on other measures (other than flexibility) under a framework of dynamic  
295 brain network. For example, using resting-state fMRI data collected from 62 ASD  
296 patients/57 TD participants and the “transient connectivity patterns/states”-based  
297 analyses, Mash et al. (59) found an increased variability over time (decreased stability)

298 of brain network in ASD patients, which is in line with the results in the current study.  
299 However, using fMRI data from 24 ASD patients and 26 TD individuals, an opposite  
300 conclusion was reported by Watanabe et al. (60) that ASD is associated with “overly  
301 stable neural dynamics” (increased stability) in functional brain network. Notably, by  
302 analyzing a multi-site dataset, the sample size in the current study is much larger when  
303 compared to most of the above published studies, which could lead to more reliable  
304 results (32). Therefore, our results may offer more solid evidence to demonstrate that  
305 ASD is associated with a “less stable” functional brain network.

306 At the local (subnetwork and nodal) levels, it was observed that ASD-related  
307 decreases in stabilities of the brain network (increases in brain network flexibilities)  
308 were mainly found in the default-mode and sensorimotor areas (**Figure 2B** and **Figure**  
309 **3**). The default-mode subnetwork in the brain is known to mediate one’s self-referential  
310 and internally-directed processing (61), and a decreased stability of it has been linked  
311 to multiple common mental illnesses such as depression (39,62). The sensorimotor  
312 areas in the brain play important roles in sensorimotor control (63), whose dysfunctions  
313 have also been associated with multiple illnesses such as depression and schizophrenia  
314 (17,64). Actually, the key functions of these brain systems are well known to be  
315 disrupted in ASD supported by previous studies. For example, there has been ample  
316 evidence that ASD patients are impaired in one of the key functions of the default-mode  
317 subnetwork: self-referential cognition, which is the ability to process social information  
318 relative to oneself, and such impairments may be closely related to the social cognitive  
319 dysfunction in ASD (65–68). On the other hand, it has been widely reported that  
320 sensorimotor skills are atypical in individuals with ASD, and such deficits are  
321 associated with severity of ASD symptoms (69–71). Therefore, results of the current  
322 study may point to ASD-related dysfunctions in the default-mode and sensorimotor  
323 systems from a perspective of brain functional dynamics, which may underlie the  
324 clinical features of ASD such as impaired self-referential cognition and sensorimotor  
325 difficulties.

326 At the nodal level, significant decreases in flexibilities (increased stability) in ASD  
327 patients were additionally observed in several occipital regions (**Figure 3**). Such  
328 alterations, interestingly, are opposite to the observed ASD-related changes at the  
329 global level, as well as the changes in other subnetworks. While a decreased stability  
330 may suggest abnormal changes in the brain network as mentioned earlier, an

331 excessively “decreased variability” (increased stability) may be also indicative of brain  
332 dysfunctions and decreased ability to adapt to changing environmental demands (31,53).  
333 The occipital cortex is known to involved in the visual processing of the brain (53,72);  
334 previous research has reported significant ASD-related alterations in both structures  
335 and functions in the occipital cortex, which were associated with visual processing and  
336 social communication deficits in ASD patients (73,74). Our results thus again  
337 highlighted the critical importance of focusing on the occipital areas in research on  
338 ASD. Furthermore, combining such results with finding in the default-  
339 mode/sensorimotor areas, it might be concluded that both excessively increased and  
340 decreased functional stabilities (in different brain systems) are involved in the  
341 pathobiology of ASD.

342 Our study has some limitations. First, although positive correlations were shown  
343 between the brain network flexibilities and ASD symptom severity in the entire sample  
344 (**Figure 4**), no significant results were obtained when testing the correlations in the  
345 ASD group independently to support our clinical symptoms-related hypotheses. Second,  
346 the current study used cross-sectional data and thus we were unable to ascertain the  
347 participants’ developmental trajectories; future studies will benefit from longitudinal  
348 designs.

349 In conclusion, this study investigated the possible relationships between ASD and  
350 changes in functional brain network dynamics using a multi-site dataset. The results  
351 suggested significantly increased brain network flexibilities (indicating a decreased  
352 stability) at the global level, as well as at the local level within the default-mode and  
353 sensorimotor areas in ASD patients than TD participants. Additionally, significant  
354 ASD-related decreases in flexibilities (indicating excessively increased stability) were  
355 also observed in several occipital regions at the nodal level. These results also pointed  
356 to ASD-related dysfunctions in the default-mode, sensorimotor, and occipital systems  
357 from a perspective of brain network stability, which can further strengthen our  
358 understanding of the pathobiology of ASD.

359

360 **Author contributions**

361 HZ, ST and YL conceived the idea and structured the manuscript. YL performed  
362 the data analysis. HZ and YL drafted the manuscript. DP, ST, and AB revised the  
363 manuscript. All authors have read and agreed to the published version of the manuscript.

364

### 365 **Funding**

366 This research was funded by the Natural Science Foundation of Hunan Province,  
367 China (2023JJ60438 to Hui Zhang), the Scientific Research Launch Project for new  
368 employees of the Second Xiangya Hospital of Central South University (to Bian Yao  
369 and Yicheng Long), the Health Research Project of Hunan Provincial Health  
370 Commission (W20243225 to Yicheng Long), and the National Natural Science  
371 Foundation of China (82201692 to Yicheng Long).

372

### 373 **Conflict of Interest Statement**

374 The authors declare no conflict of interest.

375

### 376 **References**

- 377 1. Hirota T, King BH. Autism Spectrum Disorder. *JAMA* (2023) 329:157. doi:  
378 10.1001/jama.2022.23661
- 379 2. Wang L, Wang B, Wu C, Wang J, Sun M. Autism Spectrum Disorder:  
380 Neurodevelopmental Risk Factors, Biological Mechanism, and Precision  
381 Therapy. *Int J Mol Sci* (2023) 24:1819. doi: 10.3390/ijms24031819
- 382 3. Talantseva OI, Romanova RS, Shurdova EM, Dolgorukova TA, Sologub PS,  
383 Titova OS, Kleeva DF, Grigorenko EL. The global prevalence of autism  
384 spectrum disorder: A three-level meta-analysis. *Front Psychiatry* (2023) 14: doi:  
385 10.3389/fpsyt.2023.1071181
- 386 4. Willsey HR, Willsey AJ, Wang B, State MW. Genomics, convergent  
387 neuroscience and progress in understanding autism spectrum disorder. *Nat Rev*  
388 *Neurosci* (2022) 23:323–341. doi: 10.1038/s41583-022-00576-7
- 389 5. Long Y, Li X, Cao H, Zhang M, Lu B, Huang Y, Liu M, Xu M, Liu Z, Yan C, et  
390 al. Common and distinct functional brain network abnormalities in adolescent,

- 391 early-middle adult, and late adult major depressive disorders. *Psychol Med*  
392 (2023)1–10. doi: 10.1017/S0033291723002234
- 393 6. Lin Z, Long Y, Wu Z, Xiang Z, Ju Y, Liu Z. Associations between brain  
394 abnormalities and common genetic variants for schizophrenia: A narrative  
395 review of structural and functional neuroimaging findings. *Ann Palliat Med*  
396 (2021) 10:10031–10052. doi: 10.21037/apm-21-1210
- 397 7. Li X, Huang Y, Liu M, Zhang M, Liu Y, Teng T, Liu X, Yu Y, Jiang Y, Ouyang  
398 X, et al. Childhood trauma is linked to abnormal static-dynamic brain topology  
399 in adolescents with major depressive disorder. *International Journal of Clinical*  
400 *and Health Psychology* (2023) 23: doi: 10.1016/j.ijchp.2023.100401
- 401 8. Hua Z, Hu J, Zeng H, Li J, Cao Y, Gan Y. Auditory language comprehension  
402 among children and adolescents with autism spectrum disorder: An ALE meta-  
403 analysis of fMRI studies. *Autism Research* (2024) 17:482–496. doi:  
404 10.1002/aur.3055
- 405 9. Larson C, Thomas HR, Crutcher J, Stevens MC, Eigsti I-M. Language Networks  
406 in Autism Spectrum Disorder: A systematic review of connectivity-based fMRI  
407 studies. *Rev J Autism Dev Disord* (2023) doi: 10.1007/s40489-023-00382-6
- 408 10. Lee Y, Park B, James O, Kim S-G, Park H. Autism Spectrum Disorder Related  
409 Functional Connectivity Changes in the Language Network in Children,  
410 Adolescents and Adults. *Front Hum Neurosci* (2017) 11: doi:  
411 10.3389/fnhum.2017.00418
- 412 11. Xu S, Li M, Yang C, Fang X, Ye M, Wei L, Liu J, Li B, Gan Y, Yang B, et al.  
413 Altered Functional Connectivity in Children With Low-Function Autism  
414 Spectrum Disorders. *Front Neurosci* (2019) 13: doi: 10.3389/fnins.2019.00806
- 415 12. Sizemore AE, Bassett DS. Dynamic graph metrics: Tutorial, toolbox, and tale.  
416 *Neuroimage* (2018) 180:417–427. doi: 10.1016/j.neuroimage.2017.06.081
- 417 13. Long Y, Ouyang X, Yan C, Wu Z, Huang X, Pu W, Cao H, Liu Z, Palaniyappan  
418 L. Evaluating test–retest reliability and sex-/age-related effects on temporal  
419 clustering coefficient of dynamic functional brain networks. *Hum Brain Mapp*  
420 (2023) 44:2191–2208. doi: 10.1002/hbm.26202

- 421 14. Rossi A, Deslauriers-Gauthier S, Natale E. On null models for temporal small-  
422 worldness in brain dynamics. *Network Neuroscience* (2024) 8:377–394. doi:  
423 10.1162/netn\_a\_00357
- 424 15. Liu D, Liu X, Long Y, Xiang Z, Wu Z, Liu Z, Bian D, Tang S. Problematic  
425 smartphone use is associated with differences in static and dynamic brain  
426 functional connectivity in young adults. *Front Neurosci* (2022) 16: doi:  
427 10.3389/fnins.2022.1010488
- 428 16. Ouyang X, Long Y, Wu Z, Liu D, Liu Z, Huang X. Temporal Stability of  
429 Dynamic Default Mode Network Connectivity Negatively Correlates with  
430 Suicidality in Major Depressive Disorder. *Brain Sci* (2022) 12: doi:  
431 10.3390/brainsci12091263
- 432 17. Long Y, Liu Z, Chan CKY, Wu G, Xue Z, Pan Y, Chen X, Huang X, Li D, Pu W.  
433 Altered Temporal Variability of Local and Large-Scale Resting-State Brain  
434 Functional Connectivity Patterns in Schizophrenia and Bipolar Disorder. *Front*  
435 *Psychiatry* (2020) 11:422. doi: 10.3389/fpsyt.2020.00422
- 436 18. Han S, Cui Q, Wang X, Li L, Li D, He Z, Guo X, Fan YS, Guo J, Sheng W, et al.  
437 Resting state functional network switching rate is differently altered in bipolar  
438 disorder and major depressive disorder. *Hum Brain Mapp* (2020) 41:3295–3304.  
439 doi: 10.1002/hbm.25017
- 440 19. Yang Z, Telesford QK, Franco AR, Lim R, Gu S, Xu T, Ai L, Castellanos FX,  
441 Yan CG, Colcombe S, et al. Measurement reliability for individual differences  
442 in multilayer network dynamics: Cautions and considerations. *Neuroimage*  
443 (2021) 225: doi: 10.1016/j.neuroimage.2020.117489
- 444 20. Pedersen M, Zalesky A, Omidvarnia A, Jackson GD. Multilayer network  
445 switching rate predicts brain performance. *Proc Natl Acad Sci U S A* (2018)  
446 115:13376–13381. doi: 10.1073/pnas.1814785115
- 447 21. He L, Zhuang K, Li Y, Sun J, Meng J, Zhu W, Mao Y, Chen Q, Chen X, Qiu J.  
448 Brain flexibility associated with need for cognition contributes to creative  
449 achievement. *Psychophysiology* (2019) 56: doi: 10.1111/psyp.13464
- 450 22. Braun U, Schäfer A, Bassett DS, Rausch F, Schweiger JI, Bilek E, Erk S,

- 451 Romanczuk-Seiferth N, Grimm O, Geiger LS, et al. Dynamic brain network  
452 reconfiguration as a potential schizophrenia genetic risk mechanism modulated  
453 by NMDA receptor function. *Proc Natl Acad Sci USA* (2016) 113:12568–12573.  
454 doi: 10.1073/pnas.1608819113
- 455 23. Tian S, Zhang S, Mo Z, Chattun MR, Wang Q, Wang L, Zhu R, Shao J, Wang X,  
456 Yao Z, et al. Antidepressants normalize brain flexibility associated with multi-  
457 dimensional symptoms in major depressive patients. *Prog*  
458 *Neuropsychopharmacol Biol Psychiatry* (2020) 100: doi:  
459 10.1016/j.pnpbp.2020.109866
- 460 24. Lei T, Liao X, Chen X, Zhao T, Xu Y, Xia M, Zhang J, Xia Y, Sun X, Wei Y, et  
461 al. Progressive Stabilization of Brain Network Dynamics during Childhood and  
462 Adolescence. *Cerebral Cortex* (2022) 32:1024–1039. doi:  
463 10.1093/cercor/bhab263
- 464 25. Yin W, Li T, Mucha PJ, Cohen JR, Zhu H, Zhu Z, Lin W. Altered neural  
465 flexibility in children with attention-deficit/hyperactivity disorder. *Mol*  
466 *Psychiatry* (2022) 27:4673–4679. doi: 10.1038/s41380-022-01706-4
- 467 26. Betzel RF, Satterthwaite TD, Gold JI, Bassett DS. Positive affect, surprise, and  
468 fatigue are correlates of network flexibility. *Sci Rep* (2017) 7: doi:  
469 10.1038/s41598-017-00425-z
- 470 27. Lu J, Zhang X, Shu Z, Han J, Yu N. A dynamic brain network decomposition  
471 method discovers effective brain hemodynamic sub-networks for Parkinson’s  
472 disease. *J Neural Eng* (2024) 21:026047. doi: 10.1088/1741-2552/ad3eb6
- 473 28. Broeders TAA, Linsen F, Louter TS, Nawijn L, Penninx BWJH, van Tol MJ, van  
474 der Wee NJA, Veltman DJ, van der Werf YD, Schoonheim MM, et al. Dynamic  
475 reconfigurations of brain networks in depressive and anxiety disorders: The  
476 influence of antidepressants. *Psychiatry Res* (2024) 334:115774. doi:  
477 10.1016/j.psychres.2024.115774
- 478 29. Harlalka V, Bapi RS, Vinod PK, Roy D. Atypical flexibility in dynamic  
479 functional connectivity quantifies the severity in autism spectrum disorder. *Front*  
480 *Hum Neurosci* (2019) 13: doi: 10.3389/fnhum.2019.00006



- 481 30. Huang D, Liu Z, Cao H, Yang J, Wu Z, Long Y. Childhood trauma is linked to  
482 decreased temporal stability of functional brain networks in young adults. *J*  
483 *Affect Disord* (2021) 290:23–30. doi: 10.1016/j.jad.2021.04.061
- 484 31. Long Y, Liu X, Liu Z. Temporal Stability of the Dynamic Resting-State  
485 Functional Brain Network: Current Measures, Clinical Research Progress, and  
486 Future Perspectives. *Brain Sci* (2023) 13:429. doi: 10.3390/brainsci13030429
- 487 32. Cao H, McEwen SC, Forsyth JK, Gee DG, Bearden CE, Addington J, Goodyear  
488 B, Cadenhead KS, Mirzakhani H, Cornblatt BA, et al. Toward leveraging  
489 human connectomic data in large consortia: Generalizability of fmri-based brain  
490 graphs across sites, sessions, and paradigms. *Cerebral Cortex* (2019) 29:1263–  
491 1279. doi: 10.1093/cercor/bhy032
- 492 33. Long Y, Ouyang X, Yan C, Wu Z, Huang X, Pu W, Cao H, Liu Z, Palaniyappan  
493 L. Evaluating test–retest reliability and sex-/age-related effects on temporal  
494 clustering coefficient of dynamic functional brain networks. *Hum Brain Mapp*  
495 (2023) 44:2191–2208. doi: 10.1002/hbm.26202
- 496 34. Jain P, Sao AK, Minhas AS. Analyzing the Effect of Resolution of Network  
497 Nodes on the Resting State Functional Connectivity Maps of Schizophrenic  
498 Human Brains. *2021 43rd Annual International Conference of the IEEE*  
499 *Engineering in Medicine & Biology Society (EMBC)*. IEEE (2021). p. 6695–  
500 6698 doi: 10.1109/EMBC46164.2021.9630822
- 501 35. Di Martino A, Yan CG, Li Q, Denio E, Castellanos FX, Alaerts K, Anderson JS,  
502 Assaf M, Bookheimer SY, Dapretto M, et al. The autism brain imaging data  
503 exchange: Towards a large-scale evaluation of the intrinsic brain architecture in  
504 autism. *Mol Psychiatry* (2014) 19: doi: 10.1038/mp.2013.78
- 505 36. Cameron C, Yassine B, Carlton C, Francois C, Alan E, Andrés J, Budhachandra  
506 K, John L, Qingyang L, Michael M, et al. The Neuro Bureau Preprocessing  
507 Initiative: open sharing of preprocessed neuroimaging data and derivatives.  
508 *Front Neuroinform* (2013) 7: doi: 10.3389/conf.fninf.2013.09.00041
- 509 37. Lord C, Risi S, Lambrecht L, Cook EH, Leventhal BL, Dilavore PC, Pickles A,  
510 Rutter M. The Autism Diagnostic Observation Schedule-Generic: A standard

- 511 measure of social and communication deficits associated with the spectrum of  
512 autism. *J Autism Dev Disord* (2000) 30: doi: 10.1023/A:1005592401947
- 513 38. Tang S, Wu Z, Cao H, Chen X, Wu G, Tan W, Liu D, Yang J, Long Y, Liu Z.  
514 Age-Related Decrease in Default-Mode Network Functional Connectivity Is  
515 Accelerated in Patients With Major Depressive Disorder. *Front Aging Neurosci*  
516 (2022) 13: doi: 10.3389/fnagi.2021.809853
- 517 39. Long Y, Cao H, Yan C, Chen X, Li L, Castellanos FX, Bai T, Bo Q, Chen G,  
518 Chen N, et al. Altered resting-state dynamic functional brain networks in major  
519 depressive disorder: Findings from the REST-meta-MDD consortium.  
520 *Neuroimage Clin* (2020) 26:102163. doi: 10.1016/j.nicl.2020.102163
- 521 40. Yan CG, Chen X, Li L, Castellanos FX, Bai TJ, Bo QJ, Cao J, Chen GM, Chen  
522 NX, Chen W, et al. Reduced default mode network functional connectivity in  
523 patients with recurrent major depressive disorder. *Proc Natl Acad Sci U S A*  
524 (2019) 116:9078–9083. doi: 10.1073/pnas.1900390116
- 525 41. Yang H, Chen X, Chen ZB, Li L, Li XY, Castellanos FX, Bai TJ, Bo QJ, Cao J,  
526 Chang ZK, et al. Disrupted intrinsic functional brain topology in patients with  
527 major depressive disorder. *Mol Psychiatry* (2021) 26:7363–7371. doi:  
528 10.1038/s41380-021-01247-2
- 529 42. Aquino KM, Fulcher BD, Parkes L, Sabaroedin K, Fornito A. Identifying and  
530 removing widespread signal deflections from fMRI data: Rethinking the global  
531 signal regression problem. *Neuroimage* (2020) 212:116614. doi:  
532 10.1016/j.neuroimage.2020.116614
- 533 43. Wanger TJ, Janes AC, Frederick BB. Spatial variation of changes in test–retest  
534 reliability of functional connectivity after global signal regression: The effect of  
535 considering hemodynamic delay. *Hum Brain Mapp* (2023) 44:668–678. doi:  
536 10.1002/hbm.26091
- 537 44. Sizemore AE, Bassett DS. Dynamic graph metrics: Tutorial, toolbox, and tale.  
538 *Neuroimage* (2018) 180:417–427. doi: 10.1016/j.neuroimage.2017.06.081
- 539 45. Dosenbach NU, Nardos B, Cohen AL, Fair DA, Power JD, Church JA, Nelson  
540 SM, Wig GS, Vogel AC, Lessov-Schlaggar CN, et al. Prediction of individual

- 541 brain maturity using fMRI. *Science* (1979) (2010) 329:1358–1361. doi:  
542 10.1126/science.1194144
- 543 46. Tan W, Ouyang X, Huang D, Wu Z, Liu Z, He Z, Long Y. Disrupted intrinsic  
544 functional brain network in patients with late-life depression: Evidence from a  
545 multi-site dataset. *J Affect Disord* (2023) 323:631–639. doi:  
546 10.1016/j.jad.2022.12.019
- 547 47. Huang X, Wu Z, Liu Z, Liu D, Huang D, Long Y. Acute Effect of Betel Quid  
548 Chewing on Brain Network Dynamics: A Resting-State Functional Magnetic  
549 Resonance Imaging Study. *Front Psychiatry* (2021) 12: doi:  
550 10.3389/fpsyt.2021.701420
- 551 48. Guan S, Wan D, Zhao R, Canario E, Meng C, Biswal BB. The complexity of  
552 spontaneous brain activity changes in schizophrenia, bipolar disorder, and  
553 <sc>ADHD</sc> was examined using different variations of entropy. *Hum*  
554 *Brain Mapp* (2023) 44:94–118. doi: 10.1002/hbm.26129
- 555 49. Chu C, Zhang Z, Wang J, Wang L, Shen X, Bai L, Li Z, Dong M, Liu C, Yi G,  
556 et al. Evolution of brain network dynamics in early Parkinson’s disease with mild  
557 cognitive impairment. *Cogn Neurodyn* (2023) 17:681–694. doi: 10.1007/s11571-  
558 022-09868-1
- 559 50. Zhou Y, Zhu Y, Ye H, Jiang W, Zhang Y, Kong Y, Yuan Y. Abnormal changes of  
560 dynamic topological characteristics in patients with major depressive disorder. *J*  
561 *Affect Disord* (2024) 345:349–357. doi: 10.1016/j.jad.2023.10.143
- 562 51. Hu Z, Zhou C, He L. Abnormal dynamic functional network connectivity in  
563 patients with early-onset bipolar disorder. *Front Psychiatry* (2023) 14: doi:  
564 10.3389/fpsyt.2023.1169488
- 565 52. Sun Y, Collinson SL, Suckling J, Sim K. Dynamic reorganization of functional  
566 connectivity reveals abnormal temporal efficiency in schizophrenia. *Schizophr*  
567 *Bull* (2019) 45:659–669. doi: 10.1093/schbul/sby077
- 568 53. Long Y, Chen C, Deng M, Huang X, Tan W, Zhang L, Fan Z, Liu Z.  
569 Psychological resilience negatively correlates with resting-state brain network  
570 flexibility in young healthy adults: a dynamic functional magnetic resonance

- 571 imaging study. *Ann Transl Med* (2019) 7:809–809. doi:  
572 10.21037/atm.2019.12.45
- 573 54. Mucha PJ, Richardson T, Macon K, Porter MA, Onnela JP. Community structure  
574 in time-dependent, multiscale, and multiplex networks. *Science (1979)* (2010)  
575 328:876–878. doi: 10.1126/science.1184819
- 576 55. Braun U, Schäfer A, Walter H, Erk S, Romanczuk-Seiferth N, Haddad L,  
577 Schweiger JI, Grimm O, Heinz A, Tost H, et al. Dynamic reconfiguration of  
578 frontal brain networks during executive cognition in humans. *Proc Natl Acad Sci*  
579 *U S A* (2015) 112:11678–11683. doi: 10.1073/pnas.1422487112
- 580 56. Jeub LGS, Bazzi M, Jutla IS, Mucha PJ. “A generalized Louvain method for  
581 community detection implemented in MATLAB.” (2019)  
582 <https://github.com/GenLouvain/GenLouvain>
- 583 57. Bassett DS, Wymbs NF, Porter MA, Mucha PJ, Carlson JM, Grafton ST.  
584 Dynamic reconfiguration of human brain networks during learning. *Proc Natl*  
585 *Acad Sci U S A* (2011) 108:7641–7646. doi: 10.1073/pnas.1018985108
- 586 58. Paban V, Modolo J, Mheich A, Hassan M. Psychological resilience correlates  
587 with EEG source-space brain network flexibility. *Network Neuroscience* (2019)  
588 3:539–550. doi: 10.1162/netn\_a\_00079
- 589 59. Mash LE, Linke AC, Olson LA, Fishman I, Liu TT, Müller R. Transient states of  
590 network connectivity are atypical in autism: A dynamic functional connectivity  
591 study. *Hum Brain Mapp* (2019) 40:2377–2389. doi: 10.1002/hbm.24529
- 592 60. Watanabe T, Rees G. Brain network dynamics in high-functioning individuals  
593 with autism. *Nat Commun* (2017) 8:16048. doi: 10.1038/ncomms16048
- 594 61. Whitfield-Gabrieli S, Ford JM. Default mode network activity and connectivity  
595 in psychopathology. *Annu Rev Clin Psychol* (2012) 8: doi: 10.1146/annurev-  
596 clinpsy-032511-143049
- 597 62. Wise T, Marwood L, Perkins AM, Herane-Vives A, Joules R, Lythgoe DJ, Luh  
598 WM, Williams SCR, Young AH, Cleare AJ, et al. Instability of default mode  
599 network connectivity in major depression: A two-sample confirmation study.  
600 *Transl Psychiatry* (2017) 7: doi: 10.1038/tp.2017.40

- 601 63. Chen J, Jiang S, Lu B, Liao J, Yang Z, Li H, Pei H, Li J, Iturria-Medina Y, Yao  
602 D, et al. The role of the primary sensorimotor system in generalized epilepsy:  
603 Evidence from the cerebello–cerebral functional integration. *Hum Brain Mapp*  
604 (2024) 45: doi: 10.1002/hbm.26551
- 605 64. Javaheripour N, Li M, Chand T, Krug A, Kircher T, Dannlowski U, Nenadić I,  
606 Hamilton JP, Sacchet MD, Gotlib IH, et al. Altered resting-state functional  
607 connectome in major depressive disorder: a mega-analysis from the PsyMRI  
608 consortium. *Transl Psychiatry* (2021) 11:511. doi: 10.1038/s41398-021-01619-  
609 w
- 610 65. Lombardo M V., Barnes JL, Wheelwright SJ, Baron-Cohen S. Self-Referential  
611 Cognition and Empathy in Autism. *PLoS One* (2007) 2:e883. doi:  
612 10.1371/journal.pone.0000883
- 613 66. Burrows CA, Usher L V., Mundy PC, Henderson HA. The salience of the self:  
614 Self-referential processing and internalizing problems in children and  
615 adolescents with autism spectrum disorder. *Autism Research* (2017) 10:949–960.  
616 doi: 10.1002/aur.1727
- 617 67. Padmanabhan A, Lynch CJ, Schaer M, Menon V. The Default Mode Network in  
618 Autism. *Biol Psychiatry Cogn Neurosci Neuroimaging* (2017) 2:476–486. doi:  
619 10.1016/j.bpsc.2017.04.004
- 620 68. Harikumar A, Evans DW, Dougherty CC, Carpenter KLH, Michael AM. A  
621 Review of the Default Mode Network in Autism Spectrum Disorders and  
622 Attention Deficit Hyperactivity Disorder. *Brain Connect* (2021) 11:253–263. doi:  
623 10.1089/brain.2020.0865
- 624 69. Mosconi MW, Sweeney JA. Sensorimotor dysfunctions as primary features of  
625 autism spectrum disorders. *Sci China Life Sci* (2015) 58:1016–1023. doi:  
626 10.1007/s11427-015-4894-4
- 627 70. Hannant P, Cassidy S, Tavassoli T, Mann F. Sensorimotor Difficulties Are  
628 Associated with the Severity of Autism Spectrum Conditions. *Front Integr*  
629 *Neurosci* (2016) 10: doi: 10.3389/fnint.2016.00028
- 630 71. Coll S-M, Foster NEV, Meilleur A, Brambati SM, Hyde KL. Sensorimotor skills

- 631 in autism spectrum disorder: A meta-analysis. *Res Autism Spectr Disord* (2020)  
632 76:101570. doi: 10.1016/j.rasd.2020.101570
- 633 72. Beffara B, Hadj-Bouziane F, Hamed S Ben, Boehler CN, Chelazzi L, Santandrea  
634 E, Macaluso E. Separate and overlapping mechanisms of statistical regularities  
635 and salience processing in the occipital cortex and dorsal attention network. *Hum*  
636 *Brain Mapp* (2023) 44: doi: 10.1002/hbm.26520
- 637 73. Jung M, Tu Y, Lang CA, Ortiz A, Park J, Jorgenson K, Kong X-J, Kong J.  
638 Decreased structural connectivity and resting-state brain activity in the lateral  
639 occipital cortex is associated with social communication deficits in boys with  
640 autism spectrum disorder. *Neuroimage* (2019) 190:205–212. doi:  
641 10.1016/j.neuroimage.2017.09.031
- 642 74. Matsuoka K, Makinodan M, Kitamura S, Takahashi M, Yoshikawa H, Yasuno F,  
643 Ishida R, Kishimoto N, Yasuda Y, Hashimoto R, et al. Increased Dendritic  
644 Orientation Dispersion in the Left Occipital Gyrus is Associated with Atypical  
645 Visual Processing in Adults with Autism Spectrum Disorder. *Cerebral Cortex*  
646 (2020) 30:5617–5625. doi: 10.1093/cercor/bhaa121
- 647
- 648

649 **Table 1** Number of participants from each site in the analyzed sample.

| Site    | ASD | TD  | Total |
|---------|-----|-----|-------|
| NYU     | 65  | 83  | 148   |
| OLIN    | 11  | 6   | 17    |
| SDSU    | 8   | 15  | 23    |
| TRINITY | 17  | 19  | 36    |
| UCLA    | 20  | 15  | 35    |
| UM_1    | 26  | 43  | 69    |
| UM_2    | 12  | 18  | 30    |
| USM     | 32  | 18  | 50    |
| YALE    | 17  | 10  | 27    |
| Total   | 208 | 227 | 435   |

650 Abbreviations: ASD = autism spectrum disorder; TD = typical development; the full

651 names of each site can be found in the main text of the **Section 2.1**.

652

653

654 **Table 2** Comparisons on demographic and clinical characteristics between the ASD  
655 and TD groups.

|                               | ASD ( <i>n</i> = 208),<br>mean ± SD | TD ( <i>n</i> = 227),<br>mean ± SD | Group comparisons                   |
|-------------------------------|-------------------------------------|------------------------------------|-------------------------------------|
| Age (years)                   | 16.35 ± 6.72                        | 15.86 ± 5.16                       | <i>t</i> = 0.847, <i>p</i> = 0.398  |
| Sex (male/female)             | 179/29                              | 171/56                             | $\chi^2 = 7.945$ , <i>p</i> = 0.005 |
| Mean FD (mm)                  | 0.09 ± 0.05                         | 0.06 ± 0.03                        | <i>t</i> = 5.715, <i>p</i> < 0.001  |
| AODS total score <sup>a</sup> | 8.48 ± 5.90                         | 0.08 ± 0.44                        | <i>t</i> = 20.385, <i>p</i> < 0.001 |

656 Abbreviations: AODS = the Autism Diagnostic Observation Schedule; ASD = autism  
657 spectrum disorder; FD = framewise displacement; TD = typical development.

658 <sup>a</sup>Data on the AODS scores were available for 206 ASD patients and 225 TD participants,  
659 respectively.

660

661



662 **Figure Legends**

663 **Figure 1** Steps of constructing dynamic brain networks and calculating flexibility (see  
664 details in **Sections 2.3** and **2.4**). **(A)** The time series of each region of interest (ROI)  
665 were divided into a number of time windows using the sliding-windows approach. **(B)**  
666 Brain network organizations were constructed for each time window, which formed a  
667 dynamic brain network. **(C)** Flexibilities (switching rates) of each ROI were then  
668 estimated by number of times for which it switched from one “community” to  
669 another.  
670

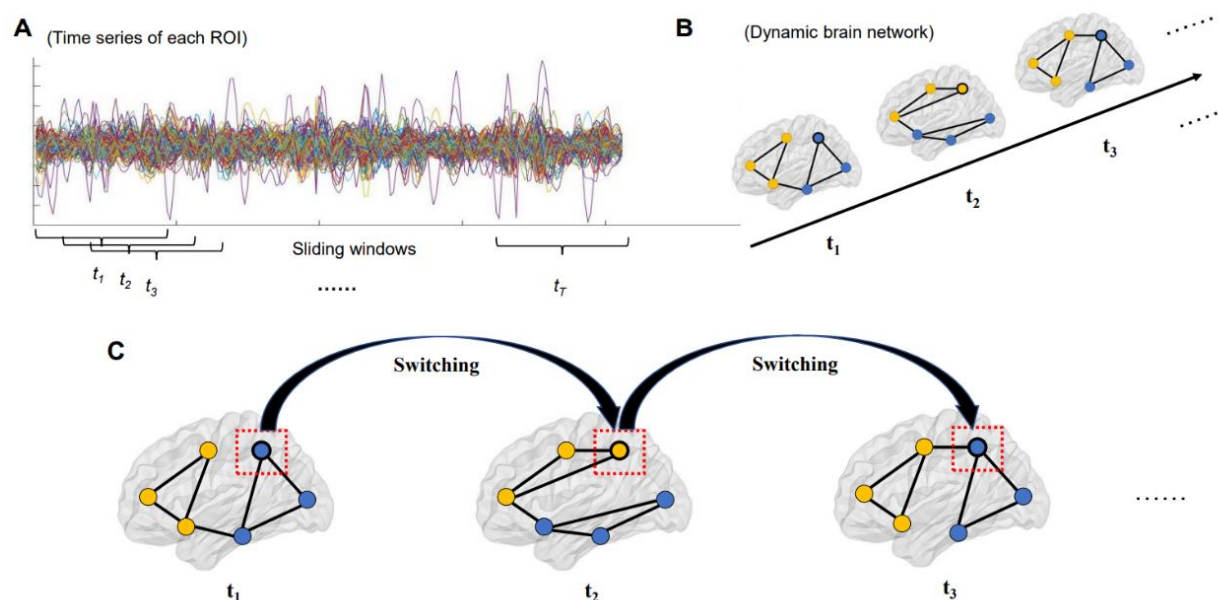

671  
672  
673

674 **Figure 2** Results of comparisons on global and subnetwork-level brain network  
675 flexibilities between the autism spectrum disorder (ASD) and typical development  
676 (TD) groups. **(A)** Comparison on flexibility at the global level. **(B)** Comparisons on  
677 flexibilities at the subnetwork level. The “\*” indicates a significant between-group  
678 difference with corrected- $p < 0.05$ .

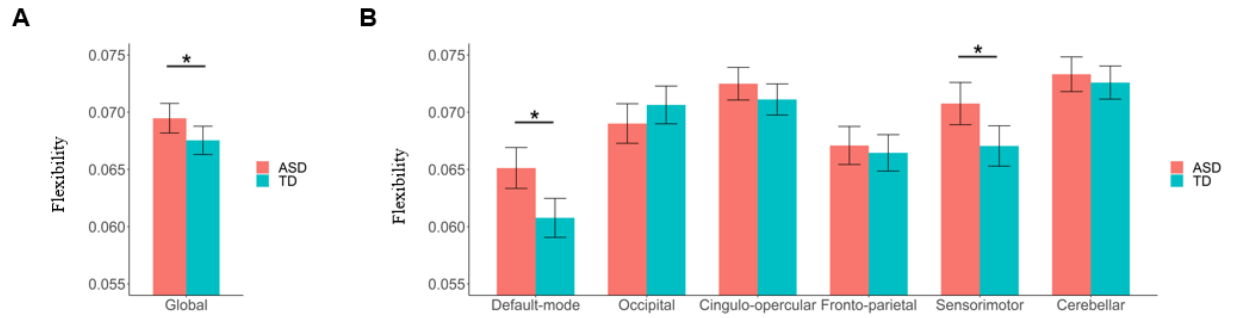

679

680

681 **Figure 3** The brain nodes which showed significant differences in flexibility  
682 (corrected- $p < 0.05$ ) between the autism spectrum disorder (ASD) and typical  
683 development (TD) groups.

684

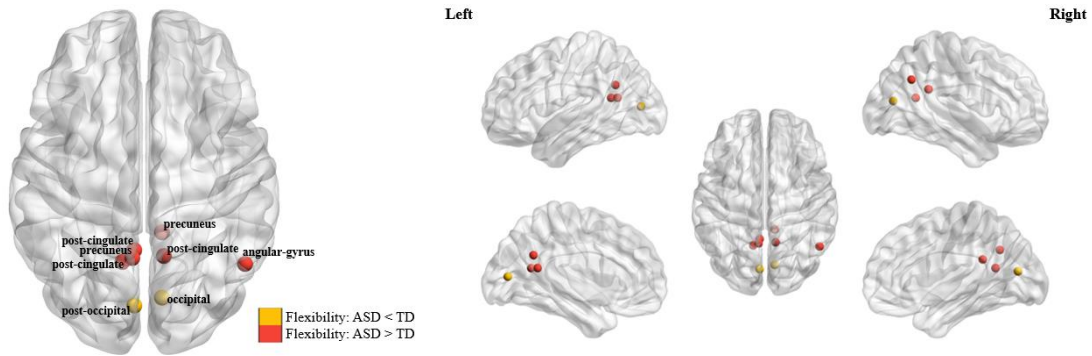

687 **Figure 4** Results of partial correlations (adjusted for sex, age, head motion, and site  
688 effects) between the Autism Diagnostic Observation Schedule (AODS) total score and  
689 subnetwork-level flexibilities in the entire sample. ASD = autism spectrum disorder;  
690 TD = typical development.

691

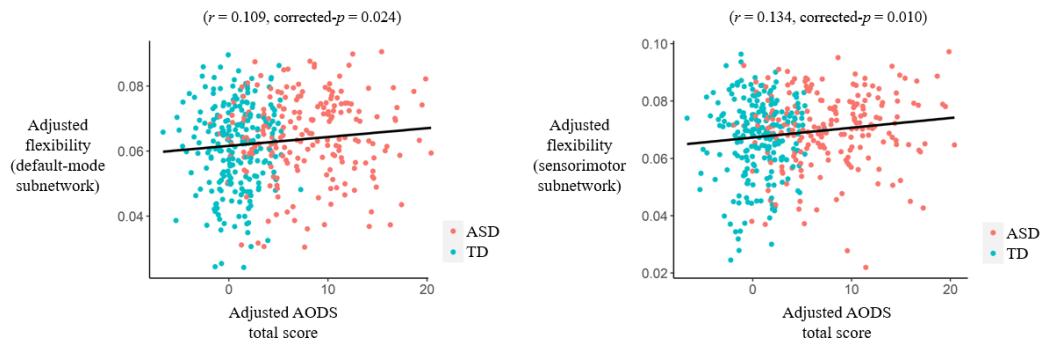

692
